# Supplementary material for: Copper-catalyzed synthesis of substituted indazoles from 2-chloroarenes at low catalyst-loading
Source: Royal Society of Chemistry journal article supplement (doi:10.1039/c1ob05875d), 2011-11-17

### 1-tert-Butyl-5-fluoro-2,3-dihydro-1H-indazol-3-one (2j).

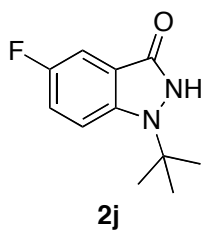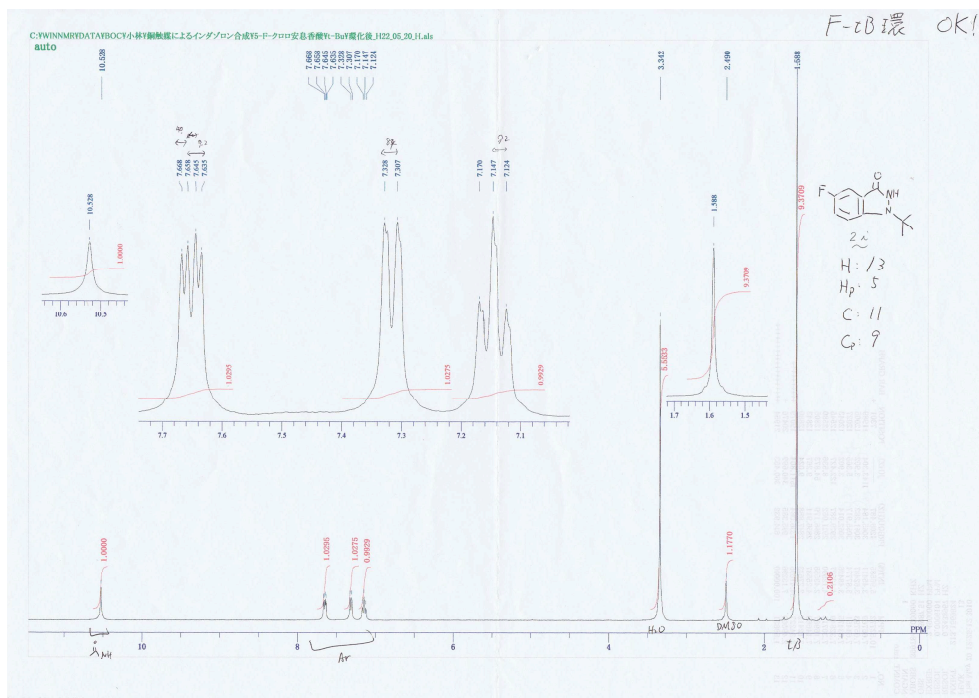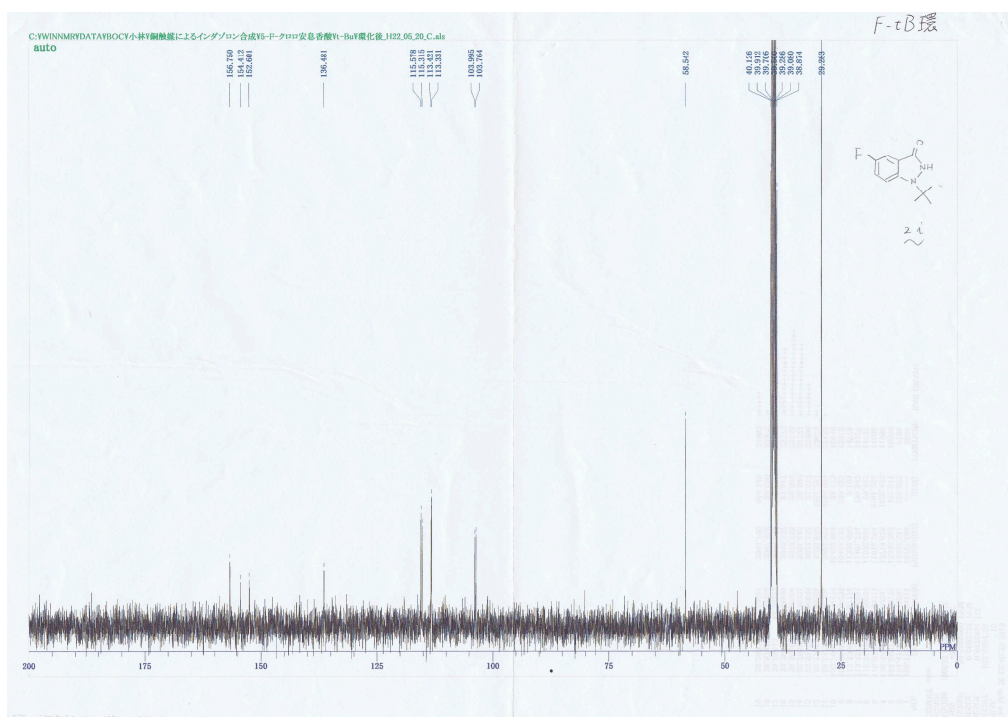

### 6-Chloro-1-phenyl-1H,2H,3H-pyrazolo[3,4-b]pyridin-3-one (2k).

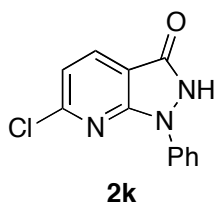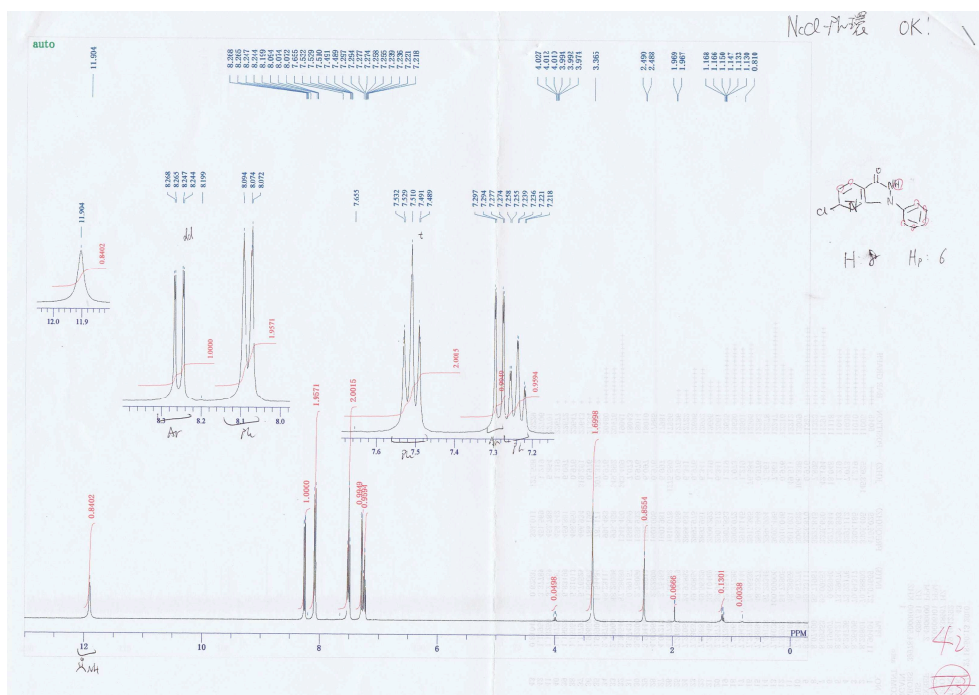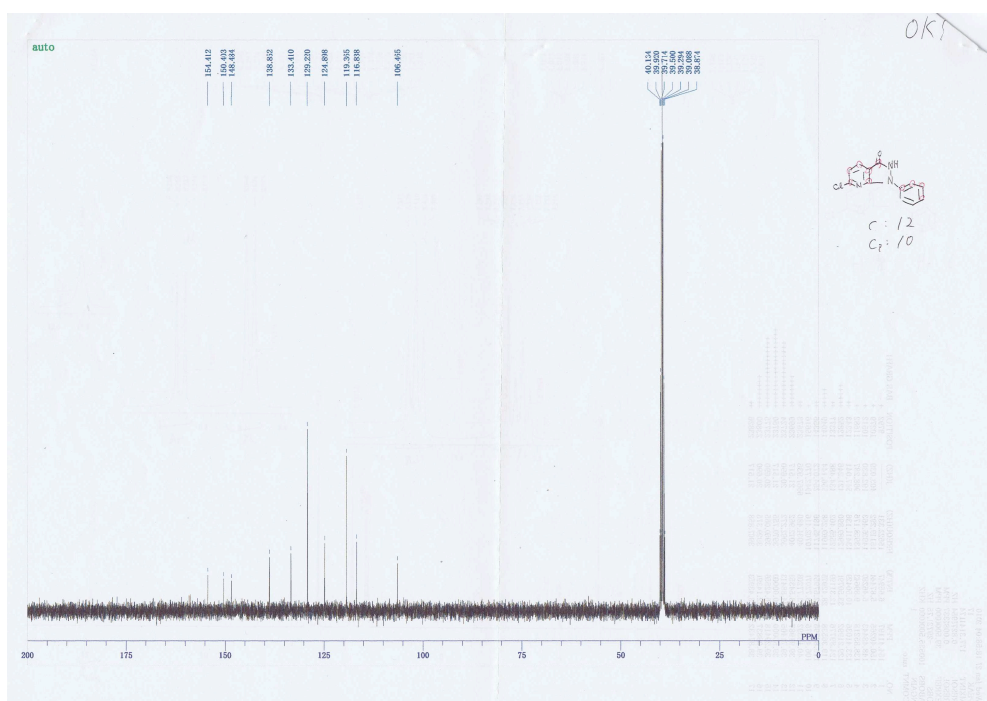

**6-Chloro-1-(4-chlorophenyl)-1H,2H,3H-pyrazolo[3,4-b]pyridin-3-one (2I).**

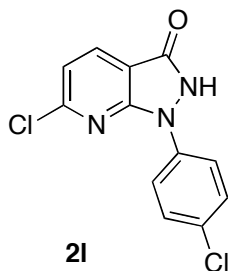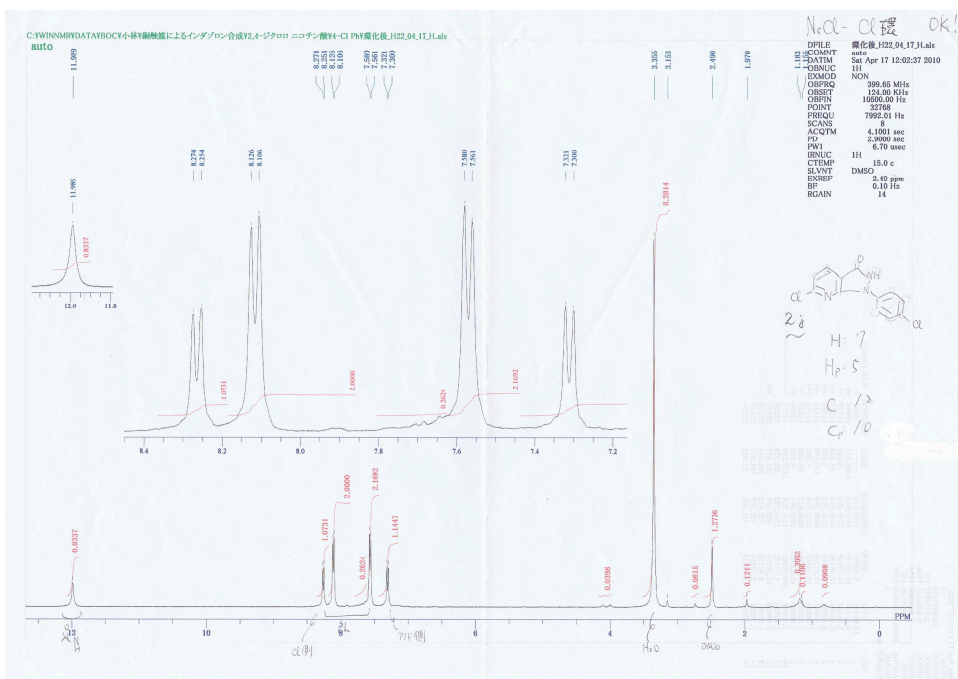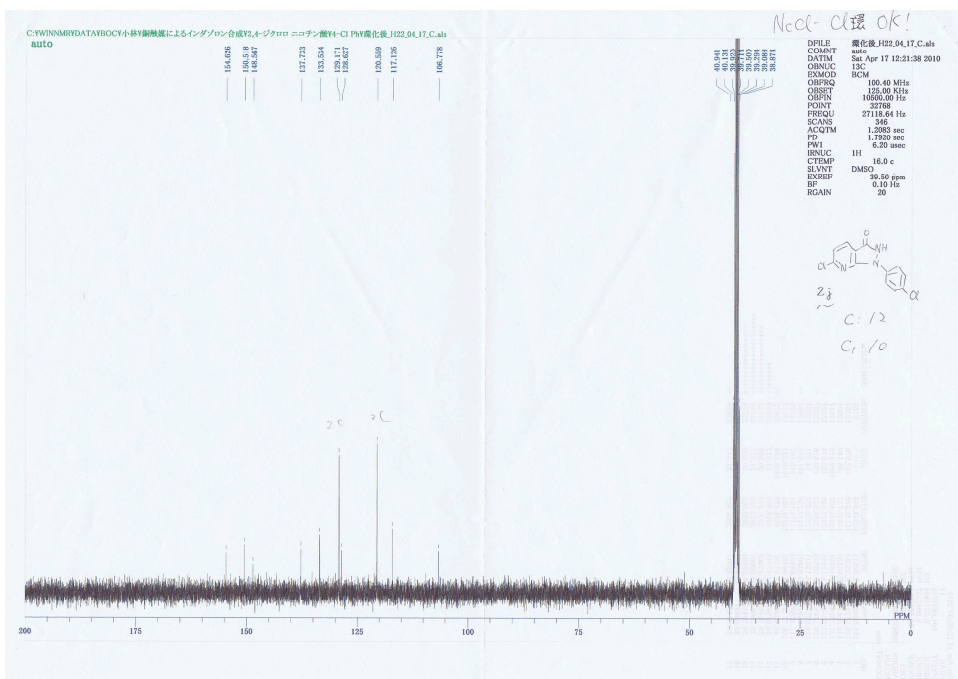

Supplement: c1ob05875d.pdf [file c1ob05875d.pdf]
